# Supplementary material for: Emergence of an Outbreak-Associated Clostridium difficile Variant with Increased Virulence
Source: PubMed Central journal article supplement (PMC4365207; doi:10.1128/jcm.03058-14), 2015-03-18
Supplement: JCM.03058-14_zjm999094154so1.pdf [file JCM.03058-14_zjm999094154so1.pdf]

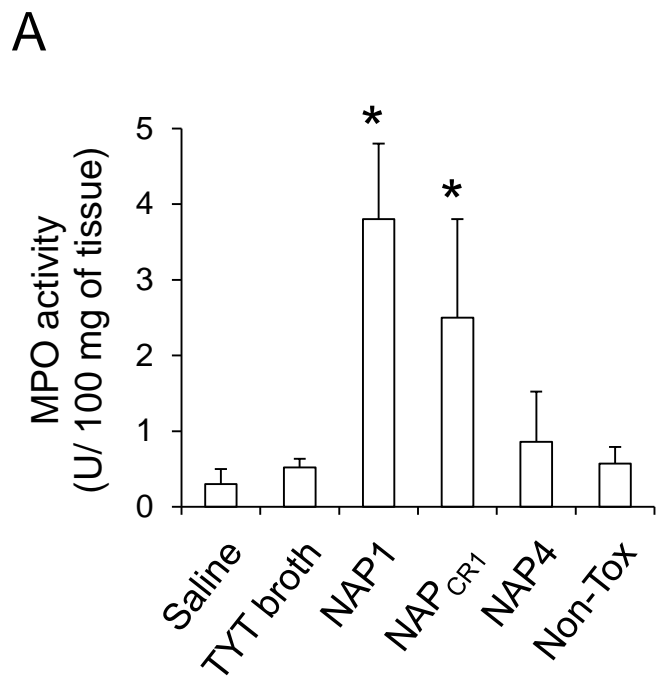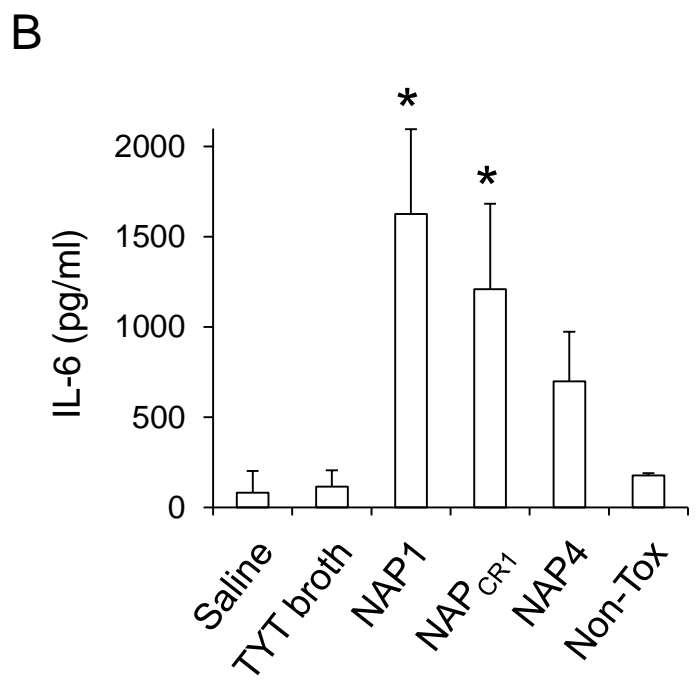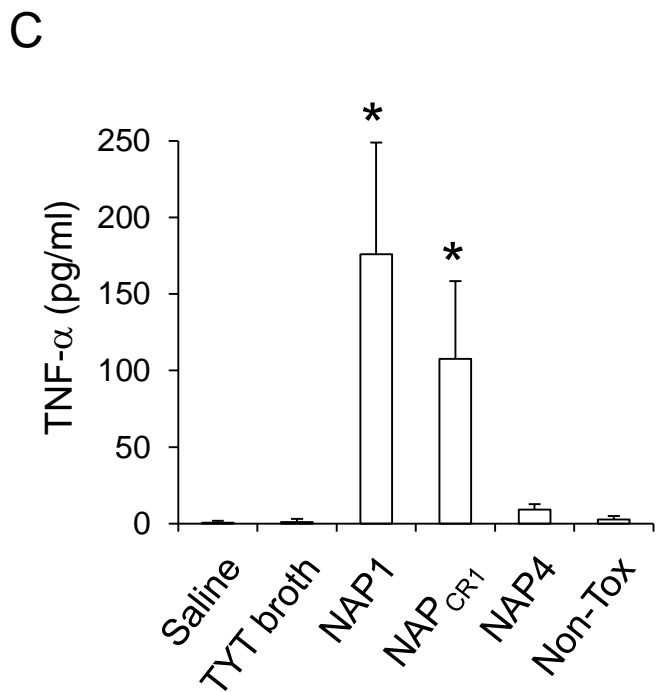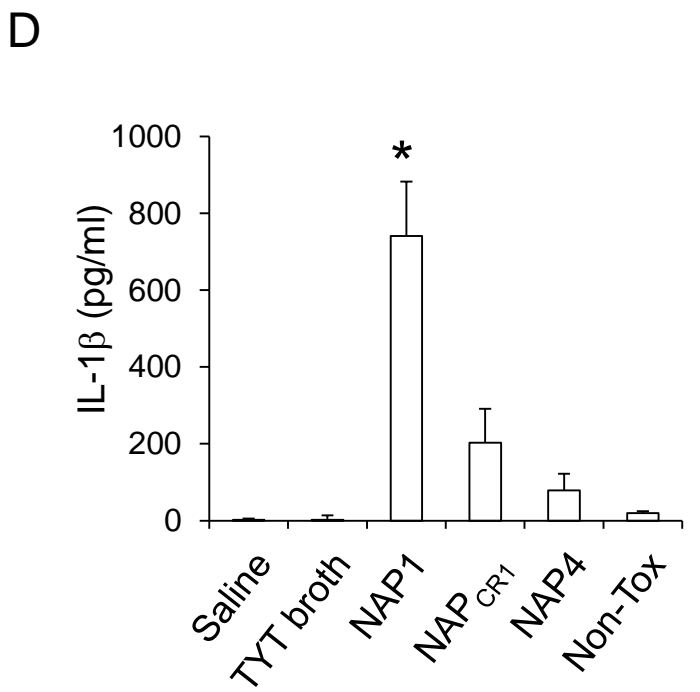

**FIGURE S1.** Effect of bacterial free supernatants on inflammatory cytokines and myeloperoxidase (MPO) activity in the ligated murine ileal model. Samples from ligated ileal groups prepared as indicated in figure 3 legend were processed for determination of MPO activity (A) or immunoenzymatic quantification of IL-6 (B), TNF-a (C) or IL-1b (D). \* $P < 0,05$ , compared to the groups without asterisk (One-way ANOVA with Bonferroni's correction).

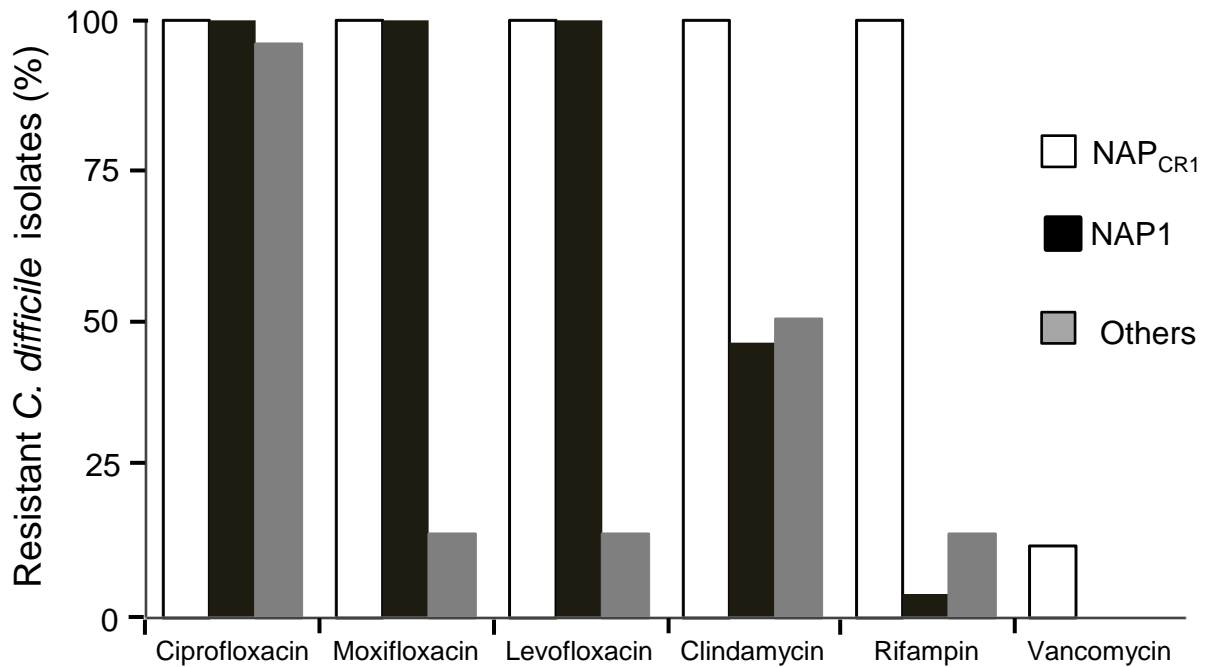

**FIGURE S2** Antimicrobial resistance profile of the *C. difficile* genotypes identified during the outbreak. The 57 strains were divided in three groups: NAP<sub>CR1</sub> (n=18), NAP1 (n=26) and other genotypes (n=13). Antibiotic susceptibility test was determined by agar dilution. The percentage of resistant strains in each group is indicated.

**TABLE S1.** Comparison of genomic features of a representative NAP<sub>CR1</sub> strain and CD630. Counts indicate the number of genes assigned to each category of functional roles.

| Subsystem Feature*                                 | Counts             |     |
|----------------------------------------------------|--------------------|-----|
|                                                    | NAP <sub>CR1</sub> | 630 |
| Phages, Prophages, Transposable elements, Plasmids | 55                 | 34  |
| DNA Metabolism                                     | 130                | 116 |
| Cell Wall and Capsule                              | 150                | 150 |
| Virulence, Disease and Defense                     | 100                | 100 |
| Potassium metabolism                               | 12                 | 12  |
| Miscellaneous                                      | 11                 | 11  |
| Cofactors, Vitamins, Prosthetic Groups, Pigments   | 252                | 249 |
| Membrane Transport                                 | 54                 | 68  |
| Iron acquisition and metabolism                    | 32                 | 31  |
| RNA Metabolism                                     | 105                | 102 |
| Nucleosides and Nucleotides                        | 150                | 146 |
| Protein Metabolism                                 | 248                | 249 |
| Cell Division and Cell Cycle                       | 44                 | 41  |
| Motility and Chemotaxis                            | 68                 | 68  |
| Regulation and Cell signaling                      | 31                 | 24  |
| Fatty Acids, Lipids, and Isoprenoids               | 95                 | 95  |
| Nitrogen Metabolism                                | 9                  | 9   |
| Dormancy and Sporulation                           | 68                 | 68  |
| Respiration                                        | 80                 | 80  |
| Stress Response                                    | 64                 | 68  |
| Metabolism of Aromatic Compounds                   | 11                 | 11  |
| Amino Acids and Derivatives                        | 297                | 301 |
| Sulfur Metabolism                                  | 24                 | 24  |
| Phosphorus Metabolism                              | 45                 | 43  |
| Carbohydrates                                      | 422                | 427 |

\*Details for subsystem and functional role assignment for the genes of each strain using SEED and RAST

servers are listed in *Materials and Methods*.

**TABLE S2.** Genes in NAP<sub>CR</sub> that are not found in *C. difficile* 630 strain by genomic comparison

| <b>Gene ID</b>       | <b>Protein length</b> | <b>Contig</b> | <b>Function</b>                                                  |
|----------------------|-----------------------|---------------|------------------------------------------------------------------|
| fig 1496.572.peg.8   | 43                    | 1             | hypothetical protein                                             |
| fig 1496.572.peg.38  | 38                    |               | hypothetical protein                                             |
| fig 1496.572.peg.46  | 49                    |               | hypothetical protein                                             |
| fig 1496.572.peg.73  | 54                    |               | FIG00516771: hypothetical protein                                |
| fig 1496.572.peg.139 | 41                    |               | hypothetical protein                                             |
| fig 1496.572.peg.231 | 40                    |               | hypothetical protein                                             |
| fig 1496.572.peg.242 | 83                    |               | hypothetical protein                                             |
| fig 1496.572.peg.248 | 51                    |               | hypothetical protein                                             |
| fig 1496.572.peg.294 | 50                    |               | hypothetical protein                                             |
| fig 1496.572.peg.374 | 52                    |               | FIG00513157: hypothetical protein                                |
| fig 1496.572.peg.400 | 39                    |               | hypothetical protein                                             |
| fig 1496.572.peg.441 | 39                    |               | hypothetical protein                                             |
| fig 1496.572.peg.460 | 53                    |               | FIG00517932: hypothetical protein                                |
| fig 1496.572.peg.490 | 39                    |               | hypothetical protein                                             |
| fig 1496.572.peg.629 | 105                   | 2             | FIG00528816: hypothetical protein                                |
| fig 1496.572.peg.635 | 138                   |               | Recombinase                                                      |
| fig 1496.572.peg.637 | 290                   |               | FIG00630629: hypothetical protein                                |
| fig 1496.572.peg.639 | 303                   |               | putative aminoglycoside 6-adenylyltransferase                    |
| fig 1496.572.peg.641 | 265                   |               | Aminoglycoside phosphotransferase                                |
| fig 1496.572.peg.643 | 220                   |               | 5-amino-6-(5-phosphoribosylamino)uracil reductase (EC 1.1.1.193) |
| fig 1496.572.peg.645 | 124                   |               | hypothetical protein                                             |
| fig 1496.572.peg.646 | 150                   |               | hypothetical protein                                             |
| fig 1496.572.peg.647 | 48                    |               | hypothetical protein                                             |
| fig 1496.572.peg.648 | 89                    |               | Iron-dependent repressor IdeR/DtxR                               |
| fig 1496.572.peg.651 | 49                    |               | hypothetical protein                                             |

|                      |     |                                                                                       |
|----------------------|-----|---------------------------------------------------------------------------------------|
| fig 1496.572.peg.652 | 99  | hypothetical protein                                                                  |
| fig 1496.572.peg.653 | 229 | hypothetical protein                                                                  |
| fig 1496.572.peg.656 | 238 | hypothetical protein                                                                  |
| fig 1496.572.peg.658 | 60  | hypothetical protein                                                                  |
| fig 1496.572.peg.659 | 200 | hypothetical protein                                                                  |
| fig 1496.572.peg.661 | 72  | hypothetical protein                                                                  |
| fig 1496.572.peg.663 | 60  | hypothetical protein                                                                  |
| fig 1496.572.peg.664 | 64  | hypothetical protein                                                                  |
| fig 1496.572.peg.670 | 41  | hypothetical protein                                                                  |
| fig 1496.572.peg.672 | 63  | FIG00514266: hypothetical protein                                                     |
| fig 1496.572.peg.677 | 99  | FIG00521858: hypothetical protein                                                     |
| fig 1496.572.peg.678 | 204 | hypothetical protein                                                                  |
| fig 1496.572.peg.679 | 162 | ADP-heptose synthase (EC 2.7.-.-) / D-glycero-beta-D-manno-heptose 7-phosphate kinase |
| fig 1496.572.peg.687 | 53  | hypothetical protein                                                                  |
| fig 1496.572.peg.688 | 110 | hypothetical protein                                                                  |
| fig 1496.572.peg.689 | 200 | Chromosome (plasmid) partitioning protein ParB                                        |
| fig 1496.572.peg.695 | 99  | hypothetical protein                                                                  |
| fig 1496.572.peg.523 | 78  | hypothetical protein                                                                  |
| fig 1496.572.peg.525 | 109 | hypothetical protein                                                                  |
| fig 1496.572.peg.581 | 40  | hypothetical protein                                                                  |
| fig 1496.572.peg.592 | 45  | hypothetical protein                                                                  |
| fig 1496.572.peg.596 | 66  | hypothetical protein                                                                  |
| fig 1496.572.peg.597 | 57  | hypothetical protein                                                                  |
| fig 1496.572.peg.599 | 46  | hypothetical protein                                                                  |
| fig 1496.572.peg.600 | 56  | Transcriptional regulator                                                             |
| fig 1496.572.peg.601 | 59  | Phage protein                                                                         |
| fig 1496.572.peg.606 | 40  | hypothetical protein                                                                  |
| fig 1496.572.peg.607 | 82  | hypothetical protein                                                                  |
| fig 1496.572.peg.618 | 53  | hypothetical protein                                                                  |

|                       |     |                                     |
|-----------------------|-----|-------------------------------------|
| fig 1496.572.peg.620  | 42  | hypothetical protein                |
| fig 1496.572.peg.624  | 80  | hypothetical protein                |
| fig 1496.572.peg.627  | 38  | hypothetical protein                |
| fig 1496.572.peg.764  | 48  | 3 hypothetical protein              |
| fig 1496.572.peg.798  | 48  | hypothetical protein                |
| fig 1496.572.peg.822  | 65  | hypothetical protein                |
| fig 1496.572.peg.922  | 48  | 4 FIG00520514: hypothetical protein |
| fig 1496.572.peg.959  | 43  | hypothetical protein                |
| fig 1496.572.peg.1021 | 38  | 5 hypothetical protein              |
| fig 1496.572.peg.1059 | 52  | FIG00527335: hypothetical protein   |
| fig 1496.572.peg.1063 | 43  | hypothetical protein                |
| fig 1496.572.peg.1190 | 38  | 6 hypothetical protein              |
| fig 1496.572.peg.1242 | 40  | hypothetical protein                |
| fig 1496.572.peg.1266 | 40  | 7 hypothetical protein              |
| fig 1496.572.peg.1270 | 237 | hypothetical protein                |
| fig 1496.572.peg.1271 | 387 | hypothetical protein                |
| fig 1496.572.peg.1275 | 53  | hypothetical protein                |
| fig 1496.572.peg.1276 | 96  | hypothetical protein                |
| fig 1496.572.peg.1277 | 120 | hypothetical protein                |
| fig 1496.572.peg.1282 | 146 | hypothetical protein                |
| fig 1496.572.peg.1283 | 150 | hypothetical protein                |
| fig 1496.572.peg.1284 | 268 | Phage protein                       |
| fig 1496.572.peg.1285 | 273 | Phage protein                       |
| fig 1496.572.peg.1286 | 268 | hypothetical protein                |

|                       |     |                      |
|-----------------------|-----|----------------------|
| fig 1496.572.peg.1287 | 165 | hypothetical protein |
| fig 1496.572.peg.1288 | 331 | hypothetical protein |
| fig 1496.572.peg.1289 | 212 | hypothetical protein |
| fig 1496.572.peg.1290 | 198 | hypothetical protein |
| fig 1496.572.peg.1291 | 324 | hypothetical protein |
| fig 1496.572.peg.1292 | 163 | hypothetical protein |
| fig 1496.572.peg.1294 | 76  | hypothetical protein |
| fig 1496.572.peg.1295 | 495 | hypothetical protein |
| fig 1496.572.peg.1296 | 591 | unknown              |
| fig 1496.572.peg.1297 | 287 | unknown              |
| fig 1496.572.peg.1298 | 398 | Phage protein        |
| fig 1496.572.peg.1299 | 63  | hypothetical protein |
| fig 1496.572.peg.1300 | 206 | hypothetical protein |
| fig 1496.572.peg.1301 | 185 | hypothetical protein |
| fig 1496.572.peg.1302 | 211 | hypothetical protein |
| fig 1496.572.peg.1303 | 102 | hypothetical protein |
| fig 1496.572.peg.1304 | 401 | hypothetical protein |
| fig 1496.572.peg.1305 | 65  | hypothetical protein |
| fig 1496.572.peg.1306 | 80  | hypothetical protein |
| fig 1496.572.peg.1307 | 209 | hypothetical protein |
| fig 1496.572.peg.1308 | 315 | hypothetical protein |
| fig 1496.572.peg.1309 | 46  | hypothetical protein |
| fig 1496.572.peg.1313 | 63  | hypothetical protein |
| fig 1496.572.peg.1314 | 86  | hypothetical protein |
| fig 1496.572.peg.1315 | 47  | hypothetical protein |
| fig 1496.572.peg.1316 | 115 | hypothetical protein |
| fig 1496.572.peg.1317 | 79  | hypothetical protein |
| fig 1496.572.peg.1319 | 113 | hypothetical protein |
| fig 1496.572.peg.1320 | 195 | hypothetical protein |

|                       |     |                                    |
|-----------------------|-----|------------------------------------|
| fig 1496.572.peg.1321 | 162 | hypothetical protein               |
| fig 1496.572.peg.1322 | 39  | hypothetical protein               |
| fig 1496.572.peg.1323 | 361 | hypothetical protein               |
| fig 1496.572.peg.1324 | 169 | hypothetical protein               |
| fig 1496.572.peg.1325 | 101 | hypothetical protein               |
| fig 1496.572.peg.1326 | 111 | hypothetical protein               |
| fig 1496.572.peg.1327 | 178 | hypothetical protein               |
| fig 1496.572.peg.1328 | 175 | hypothetical protein               |
| fig 1496.572.peg.1331 | 58  | hypothetical protein               |
| fig 1496.572.peg.1332 | 123 | Death on curing protein, Doc toxin |
| fig 1496.572.peg.1334 | 298 | hypothetical protein               |
| fig 1496.572.peg.1335 | 113 | hypothetical protein               |
| fig 1496.572.peg.1336 | 47  | hypothetical protein               |
| fig 1496.572.peg.1337 | 78  | hypothetical protein               |
| fig 1496.572.peg.1338 | 138 | hypothetical protein               |
| fig 1496.572.peg.1339 | 65  | hypothetical protein               |
| fig 1496.572.peg.1340 | 39  | hypothetical protein               |
| fig 1496.572.peg.1341 | 181 | RNA:NAD 2'-phosphotransferase      |
| fig 1496.572.peg.1342 | 109 | hypothetical protein               |
| fig 1496.572.peg.1344 | 49  | hypothetical protein               |
| fig 1496.572.peg.1345 | 62  | hypothetical protein               |
| fig 1496.572.peg.1346 | 428 | DNA ligase (ATP) (EC 6.5.1.1)      |
| fig 1496.572.peg.1347 | 67  | hypothetical protein               |
| fig 1496.572.peg.1348 | 196 | hypothetical protein               |
| fig 1496.572.peg.1349 | 63  | hypothetical protein               |
| fig 1496.572.peg.1350 | 337 | hypothetical protein               |
| fig 1496.572.peg.1351 | 132 | hypothetical protein               |
| fig 1496.572.peg.1352 | 179 | hypothetical protein               |
| fig 1496.572.peg.1353 | 123 | hypothetical protein               |



|                       |     |                                                           |
|-----------------------|-----|-----------------------------------------------------------|
| fig 1496.572.peg.1354 | 95  | hypothetical protein                                      |
| fig 1496.572.peg.1355 | 115 | hypothetical protein                                      |
| fig 1496.572.peg.1356 | 41  | hypothetical protein                                      |
| fig 1496.572.peg.1357 | 156 | hypothetical protein                                      |
| fig 1496.572.peg.1358 | 127 | hypothetical protein                                      |
| fig 1496.572.peg.1359 | 149 | hypothetical protein                                      |
| fig 1496.572.peg.1360 | 55  | hypothetical protein                                      |
| fig 1496.572.peg.1361 | 117 | hypothetical protein                                      |
| fig 1496.572.peg.1362 | 156 | hypothetical protein                                      |
| fig 1496.572.peg.1363 | 120 | hypothetical protein                                      |
| fig 1496.572.peg.1365 | 60  | hypothetical protein                                      |
| fig 1496.572.peg.1366 | 51  | hypothetical protein                                      |
| fig 1496.572.peg.1367 | 121 | hypothetical protein                                      |
| fig 1496.572.peg.1368 | 77  | hypothetical protein                                      |
| fig 1496.572.peg.1369 | 59  | hypothetical protein                                      |
| fig 1496.572.peg.1370 | 70  | hypothetical protein                                      |
| fig 1496.572.peg.1371 | 61  | hypothetical protein                                      |
| fig 1496.572.peg.1372 | 117 | hypothetical protein                                      |
| fig 1496.572.peg.1373 | 106 | hypothetical protein                                      |
| fig 1496.572.peg.1374 | 95  | hypothetical protein                                      |
| fig 1496.572.peg.1375 | 56  | hypothetical protein                                      |
| fig 1496.572.peg.1376 | 45  | hypothetical protein                                      |
| fig 1496.572.peg.1377 | 109 | hypothetical protein                                      |
| fig 1496.572.peg.1378 | 201 | COG0030: Dimethyladenosine transferase (rRNA methylation) |
| fig 1496.572.peg.1379 | 70  | hypothetical protein                                      |
| fig 1496.572.peg.1380 | 84  | hypothetical protein                                      |
| fig 1496.572.peg.1382 | 374 | Phage protein                                             |
| fig 1496.572.peg.1383 | 144 | hypothetical protein                                      |
| fig 1496.572.peg.1384 | 52  | hypothetical protein                                      |

|                       |     |                                                                 |
|-----------------------|-----|-----------------------------------------------------------------|
| fig 1496.572.peg.1386 | 222 | hypothetical protein                                            |
| fig 1496.572.peg.1387 | 57  | hypothetical protein                                            |
| fig 1496.572.peg.1388 | 282 | hypothetical protein                                            |
| fig 1496.572.peg.1389 | 192 | Phage-associated recombinase                                    |
| fig 1496.572.peg.1390 | 186 | hypothetical protein                                            |
| fig 1496.572.peg.1391 | 531 | hypothetical protein                                            |
| fig 1496.572.peg.1392 | 38  | hypothetical protein                                            |
| fig 1496.572.peg.1393 | 259 | Phage toprim domain containing protein, YorJ B.subtilis homolog |
| fig 1496.572.peg.1396 | 101 | hypothetical protein                                            |
| fig 1496.572.peg.1397 | 380 | hypothetical protein                                            |
| fig 1496.572.peg.1399 | 125 | hypothetical protein                                            |
| fig 1496.572.peg.1400 | 44  | hypothetical protein                                            |
| fig 1496.572.peg.1401 | 82  | hypothetical protein                                            |
| fig 1496.572.peg.1402 | 178 | hypothetical protein                                            |
| fig 1496.572.peg.1403 | 269 | hypothetical protein                                            |
| fig 1496.572.peg.1404 | 51  | hypothetical protein                                            |
| fig 1496.572.peg.1405 | 65  | hypothetical protein                                            |
| fig 1496.572.peg.1406 | 209 | serine/threonine protein phosphatase                            |
| fig 1496.572.peg.1407 | 85  | hypothetical protein                                            |
| fig 1496.572.peg.1408 | 95  | hypothetical protein                                            |
| fig 1496.572.peg.1409 | 270 | Adenine-specific methyltransferase (EC 2.1.1.72)                |
| fig 1496.572.peg.1410 | 121 | hypothetical protein                                            |
| fig 1496.572.peg.1411 | 191 | Guanylate kinase (EC 2.7.4.8)                                   |
| fig 1496.572.peg.1412 | 165 | Crossover junction endodeoxyribonuclease RuvC (EC 3.1.22.4)     |
| fig 1496.572.peg.1414 | 40  | hypothetical protein                                            |
| fig 1496.572.peg.1415 | 437 | Il-IS_2, transposase # fragment                                 |
| fig 1496.572.peg.1416 | 281 | hypothetical protein                                            |
| fig 1496.572.peg.1418 | 615 | hypothetical protein                                            |
| fig 1496.572.peg.1419 | 44  | hypothetical protein                                            |

|                       |     |                                     |
|-----------------------|-----|-------------------------------------|
| fig 1496.572.peg.1420 | 74  | hypothetical protein                |
| fig 1496.572.peg.1425 | 104 | hypothetical protein                |
| fig 1496.572.peg.1436 | 52  | hypothetical protein                |
| fig 1496.572.peg.1437 | 643 | hypothetical protein                |
| fig 1496.572.peg.1439 | 52  | hypothetical protein                |
| fig 1496.572.peg.1444 | 52  | 8 FIG00519437: hypothetical protein |
| fig 1496.572.peg.1447 | 40  | hypothetical protein                |
| fig 1496.572.peg.1465 | 50  | FIG00520773: hypothetical protein   |
| fig 1496.572.peg.1497 | 40  | hypothetical protein                |
| fig 1496.572.peg.1658 | 43  | 10 hypothetical protein             |
| fig 1496.572.peg.1682 | 39  | hypothetical protein                |
| fig 1496.572.peg.1690 | 45  | hypothetical protein                |
| fig 1496.572.peg.1692 | 45  | hypothetical protein                |
| fig 1496.572.peg.1754 | 93  | 11 hypothetical protein             |
| fig 1496.572.peg.1776 | 40  | hypothetical protein                |
| fig 1496.572.peg.1786 | 43  | hypothetical protein                |
| fig 1496.572.peg.1787 | 40  | hypothetical protein                |
| fig 1496.572.peg.1795 | 40  | hypothetical protein                |
| fig 1496.572.peg.1799 | 44  | hypothetical protein                |
| fig 1496.572.peg.1800 | 154 | FIG00513238: hypothetical protein   |
| fig 1496.572.peg.1825 | 45  | 12 hypothetical protein             |
| fig 1496.572.peg.1856 | 48  | hypothetical protein                |
| fig 1496.572.peg.1868 | 43  | hypothetical protein                |
| fig 1496.572.peg.1903 | 49  | hypothetical protein                |
| fig 1496.572.peg.1918 | 41  | hypothetical protein                |

|                       |     |                                   |
|-----------------------|-----|-----------------------------------|
| fig 1496.572.peg.1933 | 38  | hypothetical protein              |
| fig 1496.572.peg.1935 | 54  | FIG00520743: hypothetical protein |
| fig 1496.572.peg.1953 | 46  | hypothetical protein              |
| fig 1496.572.peg.1966 | 43  | hypothetical protein              |
| fig 1496.572.peg.2062 | 65  | hypothetical protein              |
| fig 1496.572.peg.2067 | 134 | hypothetical protein              |
| fig 1496.572.peg.2083 | 42  | hypothetical protein              |
| fig 1496.572.peg.2098 | 48  | hypothetical protein              |
| fig 1496.572.peg.2100 | 57  | hypothetical protein              |
| fig 1496.572.peg.2112 | 51  | hypothetical protein              |
|                       |     |                                   |
| fig 1496.572.peg.2213 | 50  | 13 hypothetical protein           |
|                       |     |                                   |
| fig 1496.572.peg.2252 | 39  | 14 hypothetical protein           |
| fig 1496.572.peg.2259 | 188 | FIG00517580: hypothetical protein |
|                       |     |                                   |
| fig 1496.572.peg.2285 | 53  | 15 Transcriptional regulator      |
| fig 1496.572.peg.2286 | 57  | Phage protein                     |
| fig 1496.572.peg.2287 | 48  | hypothetical protein              |
| fig 1496.572.peg.2289 | 39  | hypothetical protein              |
| fig 1496.572.peg.2290 | 145 | Phage protein                     |
| fig 1496.572.peg.2291 | 85  | hypothetical protein              |
| fig 1496.572.peg.2292 | 251 | Phage antirepressor protein       |
| fig 1496.572.peg.2295 | 46  | hypothetical protein              |
| fig 1496.572.peg.2296 | 74  | Phage protein                     |
| fig 1496.572.peg.2297 | 69  | Phage protein                     |
|                       |     |                                   |
| fig 1496.572.peg.2393 | 40  | 16 hypothetical protein           |

|                       |     |                                      |
|-----------------------|-----|--------------------------------------|
| fig 1496.572.peg.2452 | 51  | 18 thioredoxin family protein        |
| fig 1496.572.peg.2459 | 38  | hypothetical protein                 |
| fig 1496.572.peg.2472 | 39  | hypothetical protein                 |
| fig 1496.572.peg.2481 | 105 | hypothetical protein                 |
| fig 1496.572.peg.2483 | 95  | hypothetical protein                 |
|                       |     |                                      |
| fig 1496.572.peg.2499 | 52  | 19 FIG00522519: hypothetical protein |
| fig 1496.572.peg.2530 | 50  | hypothetical protein                 |
|                       |     |                                      |
| fig 1496.572.peg.2534 | 38  | 20 hypothetical protein              |
| fig 1496.572.peg.2561 | 134 | Phage-related protein                |
| fig 1496.572.peg.2562 | 46  | hypothetical protein                 |
| fig 1496.572.peg.2564 | 70  | hypothetical protein                 |
| fig 1496.572.peg.2565 | 58  | Phage protein                        |
| fig 1496.572.peg.2566 | 57  | Phage protein                        |
| fig 1496.572.peg.2567 | 263 | Phage antirepressor protein          |
| fig 1496.572.peg.2568 | 65  | Phage protein                        |
| fig 1496.572.peg.2569 | 66  | hypothetical protein                 |
| fig 1496.572.peg.2570 | 67  | hypothetical protein                 |
| fig 1496.572.peg.2571 | 66  | hypothetical protein                 |
|                       |     |                                      |
| fig 1496.572.peg.2577 | 70  | 21 hypothetical protein              |
| fig 1496.572.peg.2578 | 150 | hypothetical protein                 |
| fig 1496.572.peg.2579 | 212 | Lmo2276 protein                      |
| fig 1496.572.peg.2580 | 105 | hypothetical protein                 |
| fig 1496.572.peg.2581 | 51  | hypothetical protein                 |
| fig 1496.572.peg.2582 | 47  | hypothetical protein                 |
| fig 1496.572.peg.2584 | 111 | hypothetical protein                 |
| fig 1496.572.peg.2588 | 113 | hypothetical protein                 |

|                       |     |                                          |
|-----------------------|-----|------------------------------------------|
| fig 1496.572.peg.2589 | 125 | Transcriptional regulator, Cro/CI family |
| fig 1496.572.peg.2590 | 61  | hypothetical protein                     |
| fig 1496.572.peg.2591 | 142 | hypothetical protein                     |
| fig 1496.572.peg.2592 | 54  | hypothetical protein                     |
| fig 1496.572.peg.2593 | 115 | hypothetical protein                     |
| fig 1496.572.peg.2595 | 49  | hypothetical protein                     |
| fig 1496.572.peg.2596 | 90  | hypothetical protein                     |
| fig 1496.572.peg.2598 | 154 | hypothetical protein                     |
| fig 1496.572.peg.2603 | 130 | FIG00516442: hypothetical protein        |
| fig 1496.572.peg.2604 | 550 | Phage terminase, large subunit           |
| fig 1496.572.peg.2605 | 385 | Portal protein, phage associated         |
| fig 1496.572.peg.2608 | 96  | Phage protein                            |
| fig 1496.572.peg.2609 | 113 | hypothetical protein                     |
| fig 1496.572.peg.2610 | 138 | hypothetical protein                     |
| fig 1496.572.peg.2611 | 139 | conserved protein                        |
| fig 1496.572.peg.2614 | 128 | FIG00521161: hypothetical protein        |
| fig 1496.572.peg.2615 | 56  | hypothetical protein                     |
| fig 1496.572.peg.2625 | 508 | 22 Phage protein                         |
| fig 1496.572.peg.2626 | 540 | Exonuclease SbcC                         |
| fig 1496.572.peg.2627 | 51  | hypothetical protein                     |
| fig 1496.572.peg.2629 | 119 | hypothetical protein                     |
| fig 1496.572.peg.2630 | 343 | Phage major capsid protein               |
| fig 1496.572.peg.2631 | 69  | hypothetical protein                     |
| fig 1496.572.peg.2632 | 106 | hypothetical protein                     |
| fig 1496.572.peg.2633 | 128 | hypothetical protein                     |
| fig 1496.572.peg.2634 | 137 | hypothetical protein                     |
| fig 1496.572.peg.2635 | 275 | FIG00513450: hypothetical protein        |
| fig 1496.572.peg.2636 | 68  | hypothetical protein                     |

|                       |      |    |                                        |
|-----------------------|------|----|----------------------------------------|
| fig 1496.572.peg.2638 | 138  |    | Phage-like element PBSX protein xkdM   |
| fig 1496.572.peg.2640 | 51   |    | hypothetical protein                   |
| fig 1496.572.peg.2641 | 348  |    | Phage tail length tape-measure protein |
| fig 1496.572.peg.2642 | 95   |    | hypothetical protein                   |
| fig 1496.572.peg.2643 | 1049 |    | Phage tail length tape-measure protein |
| fig 1496.572.peg.2646 | 321  |    | Phage-like element PBSX protein xkdQ   |
| fig 1496.572.peg.2647 | 122  |    | hypothetical protein                   |
| fig 1496.572.peg.2654 | 57   |    | hypothetical protein                   |
| fig 1496.572.peg.2655 | 189  |    | FIG00513626: hypothetical protein      |
| fig 1496.572.peg.2656 | 97   |    | FIG00515668: hypothetical protein      |
|                       |      |    |                                        |
| fig 1496.572.peg.2733 | 40   | 23 | hypothetical protein                   |
| fig 1496.572.peg.2743 | 38   |    | hypothetical protein                   |
| fig 1496.572.peg.2838 | 56   |    | FIG00514757: hypothetical protein      |
| fig 1496.572.peg.2872 | 43   |    | hypothetical protein                   |
| fig 1496.572.peg.2881 | 42   |    | hypothetical protein                   |
| fig 1496.572.peg.2886 | 77   |    | hypothetical protein                   |
| fig 1496.572.peg.2894 | 166  |    | hypothetical protein                   |
| fig 1496.572.peg.2916 | 50   |    | hypothetical protein                   |
|                       |      |    |                                        |
| fig 1496.572.peg.2923 | 258  | 24 | conserved domain protein               |
| fig 1496.572.peg.2924 | 40   |    | hypothetical protein                   |
| fig 1496.572.peg.2933 | 340  |    | Phage major capsid protein #Fam0021    |
| fig 1496.572.peg.2934 | 127  |    | hypothetical protein                   |
| fig 1496.572.peg.2936 | 77   |    | hypothetical protein                   |
| fig 1496.572.peg.2937 | 91   |    | hypothetical protein                   |
| fig 1496.572.peg.2938 | 163  |    | Phage protein                          |
| fig 1496.572.peg.2946 | 169  |    | hypothetical protein                   |
| fig 1496.572.peg.2949 | 40   |    | Phage protein                          |

|                       |     |                                      |
|-----------------------|-----|--------------------------------------|
| fig 1496.572.peg.2951 | 118 | hypothetical protein                 |
| fig 1496.572.peg.2955 | 232 | Phage protein                        |
| fig 1496.572.peg.2982 | 63  | 26 Phage protein                     |
| fig 1496.572.peg.2984 | 308 | Phage protein                        |
| fig 1496.572.peg.2985 | 195 | Phage protein                        |
| fig 1496.572.peg.2986 | 151 | Phage protein                        |
| fig 1496.572.peg.2987 | 799 | Phage terminase, large subunit       |
| fig 1496.572.peg.2990 | 210 | Phage protein                        |
| fig 1496.572.peg.2991 | 65  | Phage protein                        |
| fig 1496.572.peg.2992 | 77  | hypothetical protein                 |
| fig 1496.572.peg.2995 | 74  | hypothetical protein                 |
| fig 1496.572.peg.2996 | 117 | Phage protein                        |
| fig 1496.572.peg.2997 | 117 | Phage protein                        |
| fig 1496.572.peg.3006 | 50  | hypothetical protein                 |
| fig 1496.572.peg.3007 | 64  | hypothetical protein                 |
| fig 1496.572.peg.3009 | 91  | Phage protein                        |
| fig 1496.572.peg.3010 | 81  | Phage protein                        |
| fig 1496.572.peg.3049 | 40  | 27 hypothetical protein              |
| fig 1496.572.peg.3064 | 174 | 29 hypothetical protein              |
| fig 1496.572.peg.3091 | 264 | 31 FIG00513202: hypothetical protein |
| fig 1496.572.peg.3092 | 40  | hypothetical protein                 |
| fig 1496.572.peg.3094 | 86  | Phage protein                        |
| fig 1496.572.peg.3097 | 245 | 32 hypothetical protein              |
| fig 1496.572.peg.3098 | 155 | hypothetical protein                 |



|                       |     |                                                  |
|-----------------------|-----|--------------------------------------------------|
| fig 1496.572.peg.3099 | 164 | hypothetical protein                             |
| fig 1496.572.peg.3101 | 76  | FIG00632701: hypothetical protein                |
| fig 1496.572.peg.3106 | 39  | 33 hypothetical protein                          |
| fig 1496.572.peg.3110 | 47  | 34 hypothetical protein                          |
| fig 1496.572.peg.3181 | 47  | hypothetical protein                             |
| fig 1496.572.peg.3185 | 52  | FIG00522352: hypothetical protein                |
| fig 1496.572.peg.3188 | 46  | hypothetical protein                             |
| fig 1496.572.peg.3203 | 422 | Plasmid recombination, MobE mobilization protein |
| fig 1496.572.peg.3204 | 45  | hypothetical protein                             |
| fig 1496.572.peg.3206 | 208 | Chloramphenicol acetyltransferase (EC 2.3.1.28)  |
| fig 1496.572.peg.3207 | 69  | TnpV                                             |
| fig 1496.572.peg.3242 | 46  | hypothetical protein                             |
| fig 1496.572.peg.3257 | 188 | hypothetical protein                             |
| fig 1496.572.peg.3272 | 105 | FIG00528816: hypothetical protein                |
| fig 1496.572.peg.3310 | 40  | hypothetical protein                             |
| fig 1496.572.peg.3314 | 51  | hypothetical protein                             |
| fig 1496.572.peg.3329 | 39  | 41 hypothetical protein                          |
| fig 1496.572.peg.3332 | 40  | hypothetical protein                             |
| fig 1496.572.peg.3361 | 49  | hypothetical protein                             |
| fig 1496.572.peg.3432 | 56  | Dihydrofolate reductase (EC 1.5.1.3)             |
| fig 1496.572.peg.3447 | 42  | FIG00516082: hypothetical protein                |
| fig 1496.572.peg.3469 | 49  | hypothetical protein                             |
| fig 1496.572.peg.3506 | 110 | 42 Phage protein                                 |
| fig 1496.572.peg.3512 | 63  | 44 Phage protein                                 |

|                       |     |                                                                                                         |
|-----------------------|-----|---------------------------------------------------------------------------------------------------------|
| fig 1496.572.peg.3534 | 45  | hypothetical protein                                                                                    |
| fig 1496.572.peg.3622 | 45  | hypothetical protein                                                                                    |
| fig 1496.572.peg.3677 | 38  | hypothetical protein                                                                                    |
| fig 1496.572.peg.3689 | 391 | Mobile element protein                                                                                  |
| fig 1496.572.peg.3691 | 480 | 6'-aminoglycoside N-acetyltransferase (EC 2.3.1.-) (AAC(6')) / 2"-aminoglycoside phosphotransferase (EC |
| fig 1496.572.peg.3711 | 51  | 45 hypothetical protein                                                                                 |
| fig 1496.572.peg.3773 | 51  | hypothetical protein                                                                                    |
| fig 1496.572.peg.3855 | 74  | FIG00513646: hypothetical protein                                                                       |
| fig 1496.572.peg.4017 | 174 | 46 FIG01032097: hypothetical protein                                                                    |
| fig 1496.572.peg.4027 | 47  | hypothetical protein                                                                                    |
| fig 1496.572.peg.4054 | 51  | hypothetical protein                                                                                    |
| fig 1496.572.peg.4063 | 64  | FIG00517121: hypothetical protein                                                                       |
| fig 1496.572.peg.4097 | 280 | 47 Diadenylate cyclase spyDAC; Bacterial checkpoint controller DisA with nucleotide-binding domain      |
| fig 1496.572.peg.4129 | 42  | hypothetical protein                                                                                    |
| fig 1496.572.peg.4142 | 86  | 4-hydroxyphenylacetate decarboxylase, small subunit (EC 4.1.1.83)                                       |
| fig 1496.572.peg.4189 | 42  | hypothetical protein                                                                                    |

---

1 **TABLE S3.** Genes in *C. difficile* 630 strain that are not found in NAP<sub>CR1</sub> by genomic comparison

| <b>Gene ID</b>     | <b>Protein Length</b> | <b>Function</b>      |
|--------------------|-----------------------|----------------------|
| fig 1496.1.peg.15  | 98                    |                      |
| fig 1496.1.peg.41  | 80                    |                      |
| fig 1496.1.peg.72  | 54                    |                      |
| fig 1496.1.peg.90  | 59                    |                      |
| fig 1496.1.peg.128 | 68                    |                      |
| fig 1496.1.peg.131 | 75                    |                      |
| fig 1496.1.peg.145 | 71                    |                      |
| fig 1496.1.peg.153 | 69                    |                      |
| fig 1496.1.peg.158 | 34                    |                      |
| fig 1496.1.peg.161 | 77                    |                      |
| fig 1496.1.peg.298 | 59                    |                      |
| fig 1496.1.peg.342 | 76                    |                      |
| fig 1496.1.peg.357 | 62                    |                      |
| fig 1496.1.peg.378 | 69                    |                      |
| fig 1496.1.peg.400 | 81                    |                      |
| fig 1496.1.peg.403 | 46                    |                      |
| fig 1496.1.peg.416 | 66                    |                      |
| fig 1496.1.peg.452 | 77                    |                      |
| fig 1496.1.peg.498 | 70                    |                      |
| fig 1496.1.peg.514 | 190                   |                      |
| fig 1496.1.peg.515 | 187                   | hypothetical protein |
| fig 1496.1.peg.516 | 61                    |                      |
| fig 1496.1.peg.517 | 64                    |                      |
| fig 1496.1.peg.526 | 55                    |                      |
| fig 1496.1.peg.529 | 77                    |                      |

|                     |     |                      |
|---------------------|-----|----------------------|
| fig 1496.1.peg.534  | 76  |                      |
| fig 1496.1.peg.540  | 252 |                      |
| fig 1496.1.peg.541  | 81  |                      |
| fig 1496.1.peg.547  | 110 | hypothetical protein |
| fig 1496.1.peg.581  | 67  |                      |
| fig 1496.1.peg.585  | 76  |                      |
| fig 1496.1.peg.593  | 79  |                      |
| fig 1496.1.peg.594  | 64  |                      |
| fig 1496.1.peg.663  | 73  |                      |
| fig 1496.1.peg.668  | 59  |                      |
| fig 1496.1.peg.711  | 77  |                      |
| fig 1496.1.peg.736  | 59  |                      |
| fig 1496.1.peg.816  | 70  |                      |
| fig 1496.1.peg.834  | 78  |                      |
| fig 1496.1.peg.836  | 104 |                      |
| fig 1496.1.peg.862  | 59  |                      |
| fig 1496.1.peg.865  | 52  |                      |
| fig 1496.1.peg.880  | 59  |                      |
| fig 1496.1.peg.932  | 61  |                      |
| fig 1496.1.peg.960  | 43  |                      |
| fig 1496.1.peg.965  | 99  |                      |
| fig 1496.1.peg.980  | 95  | hypothetical protein |
| fig 1496.1.peg.1010 | 68  |                      |
| fig 1496.1.peg.1014 | 125 |                      |
| fig 1496.1.peg.1017 | 120 |                      |
| fig 1496.1.peg.1025 | 64  |                      |
| fig 1496.1.peg.1046 | 58  |                      |
| fig 1496.1.peg.1092 | 73  |                      |
| fig 1496.1.peg.1144 | 61  |                      |

|                     |                                                      |
|---------------------|------------------------------------------------------|
| fig 1496.1.peg.1159 | 71                                                   |
| fig 1496.1.peg.1199 | 99                                                   |
| fig 1496.1.peg.1261 | 63                                                   |
| fig 1496.1.peg.1271 | 66                                                   |
| fig 1496.1.peg.1324 | 70                                                   |
| fig 1496.1.peg.1345 | 61                                                   |
| fig 1496.1.peg.1366 | 26                                                   |
| fig 1496.1.peg.1375 | 63                                                   |
| fig 1496.1.peg.1386 | 67                                                   |
| fig 1496.1.peg.1422 | 58                                                   |
| fig 1496.1.peg.1481 | 92                                                   |
| fig 1496.1.peg.1508 | 84                                                   |
| fig 1496.1.peg.3944 | 26 Peptide chain release factor 2 unshifted fragment |
| fig 1496.1.peg.1545 | 61                                                   |
| fig 1496.1.peg.1559 | 63                                                   |
| fig 1496.1.peg.1590 | 64                                                   |
| fig 1496.1.peg.1655 | 59                                                   |
| fig 1496.1.peg.1694 | 88                                                   |
| fig 1496.1.peg.1700 | 62                                                   |
| fig 1496.1.peg.1707 | 64                                                   |
| fig 1496.1.peg.1713 | 99                                                   |
| fig 1496.1.peg.1714 | 68                                                   |
| fig 1496.1.peg.1715 | 93                                                   |
| fig 1496.1.peg.1716 | 64                                                   |
| fig 1496.1.peg.1727 | 77                                                   |
| fig 1496.1.peg.1788 | 46                                                   |
| fig 1496.1.peg.1795 | 73                                                   |
| fig 1496.1.peg.1836 | 68                                                   |
| fig 1496.1.peg.1839 | 79                                                   |

|                     |     |                                    |
|---------------------|-----|------------------------------------|
| fig 1496.1.peg.1891 | 74  |                                    |
| fig 1496.1.peg.1896 | 66  |                                    |
| fig 1496.1.peg.1910 | 85  |                                    |
| fig 1496.1.peg.1957 | 63  |                                    |
| fig 1496.1.peg.1960 | 70  |                                    |
| fig 1496.1.peg.1969 | 130 |                                    |
| fig 1496.1.peg.1980 | 72  |                                    |
| fig 1496.1.peg.1982 | 76  |                                    |
| fig 1496.1.peg.2002 | 63  |                                    |
| fig 1496.1.peg.2006 | 61  |                                    |
| fig 1496.1.peg.2027 | 86  | threonine dehydratase biosynthetic |
| fig 1496.1.peg.2040 | 93  |                                    |
| fig 1496.1.peg.2054 | 77  |                                    |
| fig 1496.1.peg.2060 | 117 |                                    |
| fig 1496.1.peg.2061 | 63  |                                    |
| fig 1496.1.peg.2067 | 78  |                                    |
| fig 1496.1.peg.2094 | 73  |                                    |
| fig 1496.1.peg.2111 | 67  |                                    |
| fig 1496.1.peg.2183 | 30  |                                    |
| fig 1496.1.peg.2205 | 58  |                                    |
| fig 1496.1.peg.2274 | 78  |                                    |
| fig 1496.1.peg.2300 | 84  |                                    |
| fig 1496.1.peg.2349 | 78  |                                    |
| fig 1496.1.peg.2455 | 69  |                                    |
| fig 1496.1.peg.2490 | 87  |                                    |
| fig 1496.1.peg.2513 | 84  |                                    |
| fig 1496.1.peg.2546 | 96  |                                    |
| fig 1496.1.peg.2547 | 55  |                                    |
| fig 1496.1.peg.2551 | 98  | Transposase                        |

|                     |                                                     |
|---------------------|-----------------------------------------------------|
| fig 1496.1.peg.2554 | 78                                                  |
| fig 1496.1.peg.2577 | 95                                                  |
| fig 1496.1.peg.2633 | 63                                                  |
| fig 1496.1.peg.2634 | 75                                                  |
| fig 1496.1.peg.2638 | 37                                                  |
| fig 1496.1.peg.2737 | 59                                                  |
| fig 1496.1.peg.2738 | 70                                                  |
| fig 1496.1.peg.2774 | 44 MSL leader peptide 2                             |
| fig 1496.1.peg.2776 | 46 Omega protein                                    |
| fig 1496.1.peg.2778 | 44 MSL leader peptide 2                             |
| fig 1496.1.peg.2779 | 62 hypothetical protein                             |
| fig 1496.1.peg.2804 | 64                                                  |
| fig 1496.1.peg.2849 | 47                                                  |
| fig 1496.1.peg.2859 | 93                                                  |
| fig 1496.1.peg.2873 | 93                                                  |
| fig 1496.1.peg.2899 | 68                                                  |
| fig 1496.1.peg.2971 | 355 3-dehydroquinate synthase (EC 4.2.3.4)          |
| fig 1496.1.peg.3011 | 67                                                  |
| fig 1496.1.peg.3023 | 59                                                  |
| fig 1496.1.peg.3193 | 94                                                  |
| fig 1496.1.peg.3204 | 65                                                  |
| fig 1496.1.peg.3228 | 33                                                  |
| fig 1496.1.peg.3234 | 182                                                 |
| fig 1496.1.peg.3236 | 34                                                  |
| fig 1496.1.peg.3240 | 269 Methyltransferase                               |
| fig 1496.1.peg.3241 | 80                                                  |
| fig 1496.1.peg.3242 | 65                                                  |
| fig 1496.1.peg.3244 | 110 hypothetical protein                            |
| fig 1496.1.peg.3246 | 242 sulfate adenylate transferase, subunit 2 (cysD) |

|                     |     |                      |
|---------------------|-----|----------------------|
| fig 1496.1.peg.3375 | 70  |                      |
| fig 1496.1.peg.3399 | 61  |                      |
| fig 1496.1.peg.3467 | 69  |                      |
| fig 1496.1.peg.3513 | 62  |                      |
| fig 1496.1.peg.3537 | 36  |                      |
| fig 1496.1.peg.3538 | 34  |                      |
| fig 1496.1.peg.3539 | 28  |                      |
| fig 1496.1.peg.3654 | 35  |                      |
| fig 1496.1.peg.3675 | 66  |                      |
| fig 1496.1.peg.3727 | 97  |                      |
| fig 1496.1.peg.3776 | 77  | hypothetical protein |
| fig 1496.1.peg.3787 | 68  |                      |
| fig 1496.1.peg.3886 | 80  |                      |
| fig 1496.1.peg.3906 | 70  |                      |
| fig 1496.1.peg.3922 | 190 |                      |
| fig 1496.1.peg.3923 | 187 | hypothetical protein |
| fig 1496.1.peg.3924 | 61  |                      |
| fig 1496.1.peg.3925 | 64  |                      |
| fig 1496.1.peg.3934 | 55  |                      |
| fig 1496.1.peg.3936 | 108 | hypothetical protein |

---

2

3
